# Supplementary material for: Avatar Intervention for cannabis use disorder in a patient with schizoaffective disorder: A case report
Source: Preprints.org preprint supplement (doi:10.20944/preprints202307.1427.v1), 2023-07-20
Supplement: Supplementary file 1 [file supplementary]

**Table S1 - Characteristics of the questionnaires**

| **Timeline follow-back (TLFB)**  Self-reported substance use (quantity and frequency) in the last week;  *Alcohol:*  Test-retest reliability: 0.79-0.92;  Correlation with the Alcohol Dependence Scale (r=0.53 for heavy consumption days, and r=- 0.38 for low consumption days).  *Cannabis:*  Test-retest reliability ranges from 0.73 to 0.97. |
| --- |
| **Cannabis Use Problems Identification Test (CUPIT)**  Self-report screen to expedite detection of currently and potentially problematic cannabis use;  16-item (score range from 3 to 82);  Test–retest: 0.89–0.99;  Internal consistency reliability: 0.92, 0.83;  Highly significant ability to discriminate diagnostic subgroups along the severity continuum (non-problematic, risky (>12), problematic use(>20)). |
| **Marijuana Ladder**  Measure of motivation to change marijuana use;  Diagram of a ladder with 10 “rungs,” several of which are anchored by verbal labels of different degrees of readiness to change (pre-contemplation, contemplation, preparation, action, maintenance). |
| Scale of anxiety evaluation in schizophrenia **(SAES)**  Evaluates the anxiety in the past week in persons affected with schizophrenia;  18-item on a 4-points scale ranging from “none” to “severe”: Score range from 0 to 72;  Internal consistency: (α=0.71 – 0.89 across factors);  Inter-rater reliability: (ICC=0.82). |
| **Calgary depression scale of schizophrenia (CDSS)**  Assess the level of depression in schizophrenia;  9-item on a4-points scale ranging from “none” to “severe”: Score range from 0 to 27;  <6 has 82% specificity and 85% sensitivity for predicting presence of a major depressive episode  Internal consistency: 0.83  Internal reliability: 0.84 |
| **Quality of Life Enjoyment and Satisfaction Questionnaire – Short Form (QLESQ-SF)**  Self-report scale measuring enjoyment and satisfaction experienced during the past week in various areas of daily functioning (e.g., mood, hobbies, relationships with others);  16-item on a 5 -point scales ranging from “very unsatisfied” to “strongly satisfied”.  Score range from 16 to 80;  Internal consistency: 0.9;  Test–retest coefficients: 0.93. |
